# Supplementary material for: Rapid Identification and Verification of Indirubin-Containing Medicinal Plants
Source: Hindawi journal article supplement (doi:10.1155/2015/484670), 2015-01-01
Supplement: f1 [file 484670.f1.pdf]

## Supplementary Materials

TABLE S1: List of universal primers and reaction conditions for candidate barcodes.

| DNA Barcode      | Name of primers | Primer sequences 5'-3'      | PCR reaction conditions                                           |
|------------------|-----------------|-----------------------------|-------------------------------------------------------------------|
| <i>matK</i>      | KIM_3F          | CGTACAGTACTTTTGTGTTTACGAG   | 94 °C 1 min                                                       |
|                  | KIM_1R          | ACCCAGTCCATCTGGAAATCTTGGTTC | 94 °C 30 s, 52 °C 20 s, 72 °C 50 s, 35 cycles<br>72 °C 5 min      |
| <i>rbcL</i>      | 1f              | ATGTCACCACAAACAGAAAC        | 95 °C 2 min                                                       |
|                  | 724r            | TCGCATGTACCTGCAGTAGC        | 94 °C 1 min, 55 °C 30 s, 72 °C 1 min, 34 cycles<br>72 °C 7 min    |
| <i>psbA-trnH</i> | fwd PA          | GTTATGCATGAACGTAATGCTC      | 94 °C 5 min                                                       |
|                  | rev TH          | CGCGCATGGTGGATTACAATCC      | 94 °C 1 min, 55 °C 1 min, 72 °C 1.5 min, 30 cycles<br>72 °C 7 min |
| ITS2             | S2F             | ATGCGATACTTGGTGTGAAT        | 94 °C 5 min                                                       |
|                  | S3R             | GACGCTTCTCCAGACTACAAT       | 94 °C 30 s, 56 °C 30 s, 72 °C 45 s, 40 cycles<br>72 °C 10 min     |

TABLE S2: List of the GenBank No. for *matK*, *rbcL* and *psbA-trnH* barcodes (amplification and sequencing successfully).

| Species                             | Voucher No. | GenBank No. |             |                  |
|-------------------------------------|-------------|-------------|-------------|------------------|
|                                     |             | <i>matK</i> | <i>rbcL</i> | <i>psbA-trnH</i> |
| <i>Isatis tinctoria</i>             | YC0021MT29  | KJ939231    | KJ939241    | KJ939205         |
| <i>Is. tinctoria</i>                | YC0021MT05  | KJ939229    | KJ939240    | KJ939203         |
| <i>Is. tinctoria</i>                | YC0021MT20  | KJ939230    | KJ939242    | KJ939204         |
| <i>Polygonum tinctorium</i>         | YC0390MT01  | KJ939218    | KJ939248    | KJ939214         |
| <i>P. tinctorium</i>                | YC0390MT04  | KJ939219    | KJ939247    | KJ939212         |
| <i>P. tinctorium</i>                | YC0390MT05  | KJ939220    | KJ939246    | KJ939213         |
| <i>Strobilanthes cusia</i>          | YC0389MT07  | KJ939223    | KJ939233    | KJ939194         |
| <i>S. cusia</i>                     | YC0389MT01  | KJ939221    | KJ939234    | KJ939196         |
| <i>S. cusia</i>                     | YC0389MT04  | KJ939222    | KJ939232    | KJ939195         |
| <i>Polygonum hydropiper</i>         | YC0509MT02  | -           | KJ939243    | KJ939209         |
| <i>P. hydropiper</i>                | YC0509MT03  | -           | KJ939244    | KJ939210         |
| <i>P. hydropiper</i>                | YC0509MT04  | -           | KJ939245    | KJ939211         |
| <i>Polygonum chinense</i>           | YC0510MT01  | -           | -           | KJ939208         |
| <i>P. chinense</i>                  | YC0510MT02  | -           | -           | KJ939207         |
| <i>P. chinense</i>                  | YC0510MT03  | -           | -           | KJ939206         |
| <i>Clerodendrum cyrtophyllum</i>    | YC0508MT01  | KJ888428    | KJ939236    | KJ939197         |
| <i>C. cyrtophyllum</i>              | YC0508MT02  | KJ939224    | KJ939237    | KJ939198         |
| <i>C. cyrtophyllum</i>              | YC0508MT03  | KJ939225    | KJ939235    | KJ939199         |
| <i>Strobilanthes dimorphotricha</i> | YC0511MT01  | -           | KJ939249    | KJ939215         |
| <i>S. dimorphotricha</i>            | YC0511MT02  | -           | KJ939250    | KJ939216         |
| <i>S. dimorphotricha</i>            | YC0511MT03  | -           | -           | KJ939217         |
| <i>Indigofera tinctoria</i>         | YC0707MT01  | KJ939226    | -           | KJ939202         |
| <i>In. tinctoria</i>                | YC0707MT02  | KJ939227    | KJ939238    | KJ939200         |
| <i>In. tinctoria</i>                | YC0707MT03  | KJ939228    | KJ939239    | KJ939201         |
